# Supplementary material
Source: PubMed Central journal article supplement (PMC6105555)
Supplement: NIHMS922120-supplement-Supplementary_UDN_author_list.pdf [file NIHMS922120-supplement-Supplementary_UDN_author_list.pdf]

## **Members of the Undiagnosed Diseases Network**

Christopher J. Adams  
David R. Adams  
Mercedes E. Alejandro  
Patrick Allard  
Euan A. Ashley  
Mashid S. Azamian  
Carlos A. Bacino  
Ashok Balasubramanyam  
Hayk Barseghyan  
Alan H. Beggs  
Hugo J. Bellen  
Jonathan A. Bernstein  
Anna Bican  
David P. Bick  
Camille L. Birch  
Braden E. Boone  
Bret L. Bostwick  
Lauren C. Briere  
Donna M. Brown  
Matthew Brush  
Elizabeth A. Burke  
Lindsay C. Burrage  
Katherine R. Chao  
Shan Chen  
Gary D. Clark  
Joy D. Cogan  
Cynthia M. Cooper  
William J. Craigie  
Mariska Davids  
Jyoti G. Dayal  
Esteban C. Dell'Angelica  
Shweta U. Dhar  
Katrina M. Dipple  
Laurel A. Donnell-Fink  
Naghmeh Dorrani  
Daniel C. Dorset  
David D. Draper  
Annika M. Dries  
David J. Eckstein  
Lisa T. Emrick  
Christine M. Eng  
Cecilia Esteves  
Tyra Estwick  
Paul G. Fisher  
Trevor S. Frisby  
Kate Frost  
William A. Gahl  
Valerie Gartner  
Rena A. Godfrey  
Mitchell Goheen  
Gretchen A. Golas  
David B. Goldstein  
Mary G. Gordon  
Sarah E. Gould  
Jean-Philippe F. Gourdine  
Brett H. Graham  
Catherine A. Groden  
Andrea L. Gropman  
Mary E. Hackbarth  
Melissa Haendel  
Rizwan Hamid  
Neil A. Hanchard  
Lori H. Handley  
Isabel Hardee  
Matthew R. Herzog  
Ingrid A. Holm  
Ellen M. Howerton  
Howard J. Jacob  
Mahim Jain  
Yong-hui Jiang  
Jean M. Johnston  
Angela L. Jones  
Alanna E. Koehler  
David M. Koeller  
Isaac S. Kohane  
Jennefer N. Kohler  
Donna M. Krasnewich  
Elizabeth L. Krieg  
Joel B. Krier  
Jennifer E. Kyle  
Seema R. Lalani  
Lea Latham  
Yvonne L. Latour  
C. Christopher Lau  
Jozef Lazar  
Brendan H. Lee  
Hane Lee  
Paul R. Lee

Shawn E. Levy  
Denise J. Levy  
Richard A. Lewis  
Adam P. Liebendorfer  
Sharyn A. Lincoln  
Carson R. Loomis  
Joseph Loscalzo  
Richard L. Maas  
Ellen F. Macnamara  
Calum A. MacRae  
Valerie V. Maduro  
May Christine V. Malicdan  
Laura A. Mamounas  
Teri A. Manolio  
Thomas C. Markello  
Paul Mazur  
Alexandra J. McCarty  
Allyn McConkie-Rosell  
Alexa T. McCray  
Thomas O. Metz  
Matthew Might  
Paolo M. Moretti  
John J. Mulvihill  
Jennifer L. Murphy  
Donna M. Muzny  
Michele E. Nehrebecky  
Stan F. Nelson  
J. Scott Newberry  
John H. Newman  
Sarah K. Nicholas  
Donna Novacic  
Jordan S. Orange  
J. Carl Pallais  
Christina GS. Palmer  
Jeanette C. Papp  
Loren DM. Pena  
John A. Phillips III  
Jennifer E. Posey  
John H. Postlethwait  
Lorraine Potocki  
Barbara N. Pusey  
Rachel B. Ramoni  
Amy K. Robertson  
Lance H. Rodan  
Jill A. Rosenfeld  
Sarah Sadozai

Susan L. Samson  
Katherine E. Schaffer  
Kelly Schoch  
Molly C. Schroeder  
Daryl A. Scott  
Prashant Sharma  
Vandana Shashi  
Edwin K. Silverman  
Janet S. Sinsheimer  
Ariane G. Soldatos  
Rebecca C. Spillmann  
Kimberly Splinter  
Joan M. Stoler  
Nicholas Stong  
Kimberly A. Strong  
Jennifer A. Sullivan  
David A. Sweetser  
Sara P. Thomas  
Cynthia J. Tift  
Nathanial J. Tolman  
Camilo Toro  
Alyssa A. Tran  
Zaheer M. Valivullah  
Eric Vilain  
Tiphonie P. Vogel  
Daryl M. Waggott  
Colleen E. Wahl  
Nicole M. Walley  
Chris A. Walsh  
Michael F. Wangler  
Mike Warburton  
Patricia A. Ward  
Katrina M. Waters  
Bobbie-Jo M. Webb-Robertson  
Alec A. Weech  
Monte Westerfield  
Matthew T. Wheeler  
Anastasia L. Wise  
Lynne A. Wolfe  
Elizabeth A. Worthey  
Shinya Yamamoto  
Yaping Yang  
Guoyun Yu  
Jing Zhang  
Patricia A. Zornio
